1 A computational framework to assess genome-wide distribution of polymorphic human  
2 endogenous retrovirus-K in human populations

3

4 Weiling Li<sup>1</sup>, Lin Lin<sup>2</sup>, Raunaq Malhotra<sup>1,4</sup>, Lei Yang<sup>3</sup>, Raj Acharya<sup>1,5</sup>, and Mary Poss<sup>3\*</sup>

5 <sup>1</sup> The School of Electrical Engineering and Computer Science,

6 <sup>2</sup> Department of Statistics, <sup>3</sup> Department of Biology and Veterinary and Biomedical Sciences

7 The Pennsylvania State University, University Park, PA, 16802, USA

8 <sup>4</sup> Commense Health, Cambridge, MA 02142, USA

9 <sup>5</sup> School of Informatics, Computing and Engineering, Indiana University, Bloomington, IN 47405,

10 USA

11

12 Running Title: Global genomic distribution of polymorphic HERV-K

13 \* Corresponding author:

14 Mary Poss

15 814 404-7061

16 maryposs@gmail.com

17

18 **Keywords** HERV-K, human endogenous retrovirus, insertional polymorphism, 1000 Genomes  
19 Project, mixture model, visualization

20

## 21 **Abstract**

22 Human Endogenous Retrovirus type K (HERV-K) is the only HERV known to be  
23 insertionally polymorphic. It is possible that HERV-Ks contribute to human disease because  
24 people differ in both number and genomic location of these retroviruses. Indeed viral  
25 transcripts, proteins, and antibody against HERV-K are detected in cancers, auto-immune, and  
26 neurodegenerative diseases. However, attempts to link a polymorphic HERV-K with any disease  
27 have been frustrated in part because population frequency of HERV-K provirus at each site is  
28 lacking and it is challenging to identify closely related elements such as HERV-K from short read  
29 sequence data. We present an integrated and computationally robust approach that uses  
30 whole genome short read data to determine the occupation status at all sites reported to  
31 contain a HERV-K provirus. Our method estimates the proportion of fixed length genomic  
32 sequence (*k-mers*) from whole genome sequence data matching a reference set of *k-mers*  
33 unique to each HERV-K loci and applies mixture model-based clustering to account for low  
34 depth sequence data. Our analysis of 1000 Genomes Project Data (KGP) reveals numerous  
35 differences among the five KGP super-populations in the frequency of individual and co-  
36 occurring HERV-K proviruses; we provide a visualization tool to easily depict the prevalence of  
37 any combination of HERV-K among KGP populations. Further, the genome burden of  
38 polymorphic HERV-K is variable in humans, with East Asian (EAS) individuals having the fewest  
39 integration sites. Our study identifies population-specific sequence variation for several HERV-K  
40 proviruses. We expect these resources will advance research on HERV-K contributions to  
41 human diseases.

42

## 43 **Author summary**

44 Human Endogenous Retrovirus type K (HERV-K) is the youngest of retrovirus families in the  
45 human genome and is the only group that is polymorphic; a HERV-K can be present in one  
46 individual but absent from others. HERV-Ks could contribute to disease risk but establishing a  
47 link of a polymorphic HERV-K to a specific disease has been difficult. We develop an easy to use  
48 method that reveals the considerable variation existing among global populations in the  
49 frequency of individual and co-occurring polymorphic HERV-K, and in the total number of HERV-  
50 K that any individual has in their genome. Our study provides a global reference set of HERV-K  
51 genomic diversity and tools needed to determine the genomic landscape of HERV-K in any  
52 patient population.

53

## 54 **Introduction**

55 Endogenous retroviruses (ERVs) are derived from infectious retroviruses that integrated  
56 into a host germ cell at some time in the evolutionary history of a species [1–5]. ERVs in  
57 humans (HERVs) comprise up to 8% of the genome and have contributed important functions  
58 to their host [6–8]. The infection events that resulted in the contemporary profile of HERVs  
59 occurred prior to emergence of modern humans so most HERVs are fixed in human populations  
60 and those of closely related primates. However some HERVs retain the ability to replicate and  
61 reintegrate into germline so that individuals differ in the number and genomic location  
62 occupied by an ERV, a situation termed insertional polymorphism [9–11]. Among all families of  
63 HERVs, HERV-K is the only one known to be insertional polymorphic in humans.

64

65           A full-length retroviral sequence is called a provirus and encodes several viral structural  
66   or regulatory proteins that are flanked by two long terminal repeats (5' or 3' LTR). While there  
67   are several HERV-K that are full length, none are infectious and most contain mutations or  
68   deletions that affect the open reading frames or truncate the virus. Further, the identical LTRs  
69   are substrates for homologous recombination, which deletes virus genes while retaining a  
70   single, or solo, LTR at the integration site [12–14]. Thus, in a population, a site could be  
71   unoccupied, occupied by a HERV-K provirus, or contain a solo LTR. Insertional polymorphism  
72   typically refers to the occupancy at a loci [15,16]. However the occupied site can contain a  
73   provirus or solo LTR and a provirus sequence can vary among individuals. Thus HERV-K and  
74   other HERVs can contribute to genomic diversity in the global human population in several  
75   ways [17].

76  
77           HERVs from multiple families have been linked with both proliferative and degenerative  
78   diseases in humans [18–24] . Although there are known mechanisms by which a HERV can  
79   cause disease; for example, by inducing genome structural variation through recombination  
80   [25–29], affecting host gene expression [30], and inappropriate activation of an immune  
81   response by viral RNA or proteins [21], it has been difficult to establish an etiological role of a  
82   HERV in any disease. HERV-K specifically has been associated with breast and other cancers  
83   [3,31–35], and autoimmune diseases, such as rheumatoid arthritis [36,37], multiple sclerosis  
84   [20,38] and systemic lupus erythematosus [8,20,39] without definitive evidence of causality or  
85   of the specific loci involved. Recently, a HERV-K envelope protein was shown to recapitulate the

86 clinical and histological lesions characterizing Amyotrophic Lateral Sclerosis [40,41], providing an  
87 important mechanistic advance of a role for a HERV-K protein in a disease.

88 In this paper, we focus on characterizing the genome landscape of known insertionally  
89 polymorphic HERV-K proviruses in the 1000 Genomes Project (KGP) data. We present a data-  
90 mining tool and a statistical framework that accommodates low depth data characteristic of the  
91 KGP - and often patient - data to estimate the presence or absence of a provirus at known  
92 HERV-K loci. Because combinations of HERV-K may act synergistically in the pathogenesis of a  
93 disease [42], we estimate the co-occurrence of polymorphic HERV-K proviruses in different  
94 populations and provide a tool to visualize HERV-K co-occurrence in global populations. Our  
95 results provide a reference of global population diversity in HERV-K proviruses at all currently  
96 known loci in the human genome and demonstrate that there are notable differences among  
97 population frequencies of HERV-Ks and the total number of HERV-Ks found in a person's  
98 genome.

99

## 100 **Results**

101

### 102 **A model to estimate polymorphic HERV-K from whole genome sequence data.**

103 The goal of this research was to develop a computationally efficient and easy to use tool  
104 that could accurately report the status of all HERV-Ks with coding potential (provirus) from  
105 whole genome sequence (WGS) data. We use the KGP database to establish the global  
106 population diversity of each polymorphic HERV-K and the burden of HERV-K in individual

107 genomes to provide a foundation to study the role of HERV-K in human disease. Our method  
108 takes as input all reads that map to identified HERV-K elements in hg19. The rationale here is  
109 that polymorphic HERV-K are very similar to those in the reference genome and will map on  
110 existing elements. The recovered reads are reduced to *k-mers* and mapped to a reference set  
111 of *k-mers* representing all unique sites in every HERV-K in the database. The output is a ratio of  
112 subject *k-mers* (*n*) that are 100% match to the reference *k-mers* (*T*) (see methods for full  
113 details).

114 Our preliminary analysis of the KGP data demonstrated that our *k-mer*-based approach  
115 is sensitive to sequence depth; some HERV-K are represented by an almost continuous range of  
116 *n/T* from 0-1 (Fig 1A), making presence/absence classification difficult. A comparison of a  
117 subset of the 28 individuals in the KGP data that have both low and high sequence depth data  
118 shows how depth affects *n/T* (Fig 1B, see S2 Fig for data of all 28 persons). If read depth is  
119 greater than 20, there is less dispersion of *n/T* values, most likely because more reads are  
120 recovered from the mapped intervals. However, the majority of the KGP data is approximately  
121 6x depth and thus to make use of this important resource, we developed a mixture model to  
122 cluster the *n/T* values from genomes sequenced at low depth. *K* was optimized to 50 because  
123 this value improved our model computational efficiency and output (Fig 1B, S1-S3 Methods, S1  
124 Fig). The states, 'provirus', 'solo LTR', and 'absent' are preliminarily assigned to each cluster  
125 based on the high depth data (Fig 1B). Individuals with *n/T*=1 have the reference allele and  
126 *n/T*=0 indicates that the HERV-K is absent (no *k-mers* to unique sites in the HERV-K were  
127 recovered from mapped sequence reads). The *k-mers* derived from persons with low and

128 intermediate n/T values were mapped to each HERV-K to determine whether they localized  
129 only in the LTR (assign 'solo LTR') or in the coding region (assign 'provirus') (S3 Fig).

130

### 131 **Fig 1. A mixture model to account for low depth WGS data**

132 A) The plot displays the n/T value for 2535 individuals from KGP with low depth sequence data for  
133 chr12:55727215-55728183 when K=70. There is little resolution of values to enable assignment to  
134 provirus, solo LTR, or absent states.

135 B) The result of the mixture model on the same data. The individual clusters generated by the model are  
136 indicated by a unique color; in the example shown, there are four clusters. K has been optimized to 50  
137 to enable clear clustering in the 'absent', 'solo LTR' and 'provirus' states. In this example, eight of the 28  
138 individuals that have both low and high depth sequence data (see S1\_Dataset:KGP) are shown to  
139 demonstrate the effect of sequence depth. The n/T ratio is 1 for persons with high depth data [red  
140 numbers, #6 and 12] who have the reference allele, while the corresponding low depth data [black  
141 numbers, yellow cluster] from the same individuals have n/T ranging from 0.7 to 0.9. There is less of an  
142 effect of depth for individuals who do not have the HERV-K (n/T=0). However, optimizing K facilitates  
143 separation of clusters for absent [red cluster, #23 and 28], and solo LTR [green cluster, #4 and 16]. States  
144 are confirmed by mapping the *k-mers* from individuals in a cluster to the reference HERV-K (S3 Fig).

145

146

### 147 **Prevalence of polymorphic HERV-K in each KGP super-population**

148 The WGS data of each individual in the KGP dataset were evaluated using our analysis  
149 workflow. HERV-Ks on chrY were not considered. Twenty sites, omitting one at chr1:73594980  
150 [see methods] were identified that were polymorphic for containing a HERV-K provirus. A

151 phylogenetic analysis of all HERV-Ks greater than 6 kbp shows that polymorphic HERV-Ks are  
152 closely related (S4 Fig). The prevalence of the 20 polymorphic HERV-Ks varied from 0.9% to  
153 99.5% when averaged across the entire KGP dataset (Table 1). However, there were notable  
154 differences in prevalence at each site among the five super-populations (AFR, EAS, AMR, EUR,  
155 SAS). Of the 20, the prevalence of seven polymorphic HERV-Ks was greater than 90% and the  
156 difference between populations with the lowest and highest prevalence was less than 6.5%  
157 (Table 1). There was 100% occupancy for six of the seven high prevalence polymorphic HERV-Ks  
158 (98.8% for the seventh), indicating that the rate of conversion to solo LTR is low for viruses at  
159 these sites (S1 Table). Two polymorphic HERV-Ks had an overall prevalence of less than 10% in  
160 any population (Table 1) and we found no evidence of a solo LTR at these sites; both are found  
161 in individuals from AFR. Nine of the remaining 11 HERV-Ks are of interest because the  
162 difference between super-populations with the highest and lowest prevalence is between 28  
163 and 80 percentage points (Table 1). Of note, the prevalence is lowest in EAS populations for the  
164 three HERV-Ks with the largest difference among super-populations.

165  
166 Individuals from African populations differ significantly from the other four super-  
167 populations in the prevalence of ten of the polymorphic HERV-K, three of which occur in close  
168 proximity on chr19. (Table 1, S2\_Dataset:compare\_prevalence). EUR and AFR super-populations  
169 are significantly different at all but one of the 20 polymorphic HERV-K based on adjusted p-  
170 values (S2\_Dataset:compare\_prevalence).

171

172 **Table 1. Provirus frequencies of polymorphic HERV-K.**



173

|                                          | <b>KGP</b>                    | <b>AFR</b> | <b>AMR</b> | <b>EAS</b> | <b>EUR</b> | <b>SAS</b> | <b>max-<br/>min</b> |
|------------------------------------------|-------------------------------|------------|------------|------------|------------|------------|---------------------|
|                                          | <b>pro-<br/>virus<br/>(%)</b> |            |            |            |            |            |                     |
| <b><u>chr1:75842771</u><sup>c</sup></b>  | 42.88                         | 26.76      | 56.53      | 6.02       | 68.91      | 66.80      | 62.89               |
| <b>chr3:112743479<sup>a</sup></b>        | 98.46                         | 96.71      | 99.72      | 99.81      | 99.60      | 97.37      | 3.09                |
| <b>chr3:148281477</b>                    | 41.89                         | 38.86      | 42.61      | 45.05      | 46.53      | 37.45      | 9.09                |
| <b><u>chr3:185280336</u><sup>a</sup></b> | 99.49                         | 98.06      | 100.00     | 100.00     | 100.00     | 100.00     | 1.94                |
| <b><u>chr4:69463709</u><sup>c</sup></b>  | 72.50                         | 93.87      | 88.92      | 31.07      | 85.35      | 61.94      | 62.80               |
| <b>chr5:156084717<sup>a</sup></b>        | 99.41                         | 98.36      | 99.72      | 100.00     | 99.80      | 99.60      | 1.64                |
| <b>chr6:57623896<sup>a</sup></b>         | 93.65                         | 90.73      | 97.16      | 90.87      | 97.23      | 94.33      | 6.50                |
| <b>chr6:78427019<sup>a</sup></b>         | 97.71                         | 95.52      | 97.16      | 99.61      | 97.23      | 99.60      | 4.10                |
| <b>chr7:4622057*<sup>c</sup></b>         | 47.50                         | 61.14      | 30.11      | 58.25      | 36.44      | 41.50      | 31.02               |
| <b>chr8:12316492<sup>c</sup></b>         | 14.08                         | 32.88      | 12.22      | 0          | 15.64      | 3.04       | 32.88               |
| <b><u>chr8:7355397</u><sup>c</sup></b>   | 18.66                         | 39.16      | 12.50      | 6.02       | 11.29      | 15.99      | 33.14               |
| <b><u>chr10:27182399</u><sup>a</sup></b> | 99.13                         | 97.46      | 99.43      | 99.81      | 99.80      | 99.80      | 2.35                |
| <b>chr11:101565794<sup>c</sup></b>       | 63.04                         | 80.87      | 77.27      | 6.99       | 86.53      | 63.16      | 79.54               |

|                                          |       |       |       |        |       |        |       |
|------------------------------------------|-------|-------|-------|--------|-------|--------|-------|
| <b><u>chr12:55727215</u></b>             | 72.19 | 72.80 | 80.40 | 63.30  | 80.99 | 65.79  | 17.69 |
| <b>chr12:58721242<sup>c</sup></b>        | 70.73 | 58.89 | 78.41 | 60.00  | 87.33 | 75.51  | 28.43 |
| <b><u>chr19:21841536<sup>c</sup></u></b> | 26.98 | 39.16 | 11.93 | 32.23  | 10.69 | 32.39  | 28.47 |
| <b><u>chr19:22414379<sup>c</sup></u></b> | 67.77 | 89.24 | 60.80 | 56.89  | 55.84 | 67.21  | 33.40 |
| <b><u>chr19:22457244<sup>b</sup></u></b> | 0.87  | 3.29  | 0.00  | 0.00   | 0.00  | 0.00   | 3.29  |
| <b>chr22:18926187<sup>a</sup></b>        | 99.49 | 98.36 | 99.72 | 100.00 | 99.80 | 100.00 | 1.64  |
| <b><u>chrX:93606603<sup>b</sup></u></b>  | 2.25  | 7.32  | 2.27  | 0.00   | 0.00  | 0.00   | 7.32  |

174 For simplicity, only the starting coordinate is listed.

175 \* The value given represents those with the tandem repeat

176 <sup>a</sup>: prevalence > 90%

177 <sup>b</sup>: low prevalence and no solo LTR

178 <sup>c</sup>: max-min difference is > 28%

179 underline: AFR significantly different from other 4 super populations.

180 See S2\_Dataset:compare\_prevalence for full data set.

181

## 182 **The number of polymorphic HERV-Ks per individual**

183

184 The HERV-K genome is close to 10 kbp. As there are 20 HERV-Ks that are polymorphic in  
 185 human populations, we asked if some individuals carry a different burden of these repetitive,  
 186 and potentially functional, viral elements than others. This was indeed the case. The number of

187 polymorphic HERV-K proviruses per person ranges from 7-18 (Fig 2, S2\_Dataset:HERV-K per  
188 person). More than 63% of individuals from all super-populations except EAS carry 12 to 14  
189 proviruses in their genome. Individuals from EAS have a lower burden with 69% of individuals  
190 carrying 9-11 HERV-K proviruses. 7% of AFR individuals have 16 or 17 proviruses compared to a  
191 maximum of 2% in other groups (S2\_Dataset:HERV-K per person). These data highlight the  
192 importance of using a comprehensive approach to study the potential disease impact of  
193 polymorphic HERV-Ks, because total HERV-K burden in individuals might influence a disease  
194 phenotype without significant variation in prevalence of each provirus in a patient pool.

195

196 **Fig 2. Histogram of the number of proviruses per individual among super-populations.**

197

198

### 199 **Co-occurrence of polymorphic HERV-Ks**

200 Our data provide a comprehensive picture of sites occupied by HERV-K provirus in each  
201 genome, which enables analysis of polymorphic HERV-K co-occurrence in populations. We  
202 assessed combinations of three, four and five polymorphic HERV-Ks and found that there are  
203 many combinations of co-occurring viruses that are population-specific (S3\_Dataset). To  
204 facilitate exploration of HERV-K combinations among KGP populations, we developed a D3.js  
205 visualization tool that allows a user to choose any combination of the 20 polymorphic HERV-K  
206 proviruses and display the co-occurrence prevalence among the 26 populations represented in  
207 the KGP data. As an example, we present a combination of four HERV-Ks to represent the  
208 variation that occurs in KGP individuals, which in this case ranges from 3% in EAS to 59% in EUR

209 (Fig 3A). We also determine that the three polymorphic HERV-Ks found on chr19 co-occur only  
210 from three AFR populations and in less than 2% of individuals (Fig 3B).

211

212 **Fig 3. A visualization tool to examine co-occurrence of polymorphic HERV-Ks.**

213 A) The co-occurrence of HERV-Ks at chr1:75842771-75849143, chr3:112743479-112752282,  
214 chr6:57623896-57628704, and chr12:58721242-58730698 in the 26 populations are represented based  
215 on their geographic location. The relative frequency for these four co-occurring HERV-Ks in each  
216 population bubble is displayed based on the color gradient shown in the scale at the top. The actual  
217 prevalence of the given combination of HERV-K provirus for each population and the cumulative  
218 prevalence for the super-population are shown in text on the right. Note that AFR and EAS have the  
219 lowest prevalence of these four polymorphic HERV-Ks.

220 B) As in (A) showing the co-occurrence of the three polymorphic HERV-Ks that are present on chr19 by  
221 population. This is a rare combination only found in two AFR populations and individuals in the  
222 Caribbean of African ancestry.

223

224

225 **HERV-K status informs KGP super-populations**

226 Because there are clearly population-specific differences in both individual HERV-K  
227 frequency and in the frequency of HERV-K co-occurrence, we explored whether the presence or  
228 absence of polymorphic HERV-Ks is sufficient to distinguish populations using Fisher's linear  
229 discriminant analysis (LDA) [43]. Based on the status 'provirus', 'solo LTR', or 'absence', there is  
230 little resolution of AFR, EUR, and EAS super-populations (Fig 4A). However, there is sufficient  
231 signature to separate AFR, EUR, and EAS if we utilize the n/T ratio on the 20 polymorphic HERV-

232 Ks (S5 Fig) and we further improve population separation if we use the  $n/T$  ratio for all 96 HERV-  
233 Ks (Fig 4B). This indicates that we are losing information by reducing the data to three states  
234 and that fixed HERV-K also contain signal for population of origin.

235

236 **Fig 4. Linear discriminant analysis of HERV-K status among three super-populations.**

237 A) LDA based on the states 'provirus', 'solo LTR' and 'absence' of the 20 polymorphic HERV-K for AFR,  
238 EAS, and EUR. AMR and SAS overlap these three populations and are removed for clarity B) LDA plot on  
239  $n/T$  ratio of all 96 HERV-K discriminates AFR, EAS, and EUR super-populations. See S6 Fig for plots with  
240 all five super-populations.

241

242 An  $n/T = 1$  indicates that we recovered all reads that map to the reference set T for a  
243 specific HERV-K. If there is a HERV-K allele that has not been reported in any database but that  
244 is common in a population, we expect  $n/T < 1$  because we require 100% match to reference set  
245 T and *k-mers* covering allelic sites will not be included. We assessed the density distributions of  
246  $n/T$  plots for each of the 96 HERV-Ks for evidence of population-specific alleles (S4 Method, S7  
247 Fig). Five HERV-Ks have some indication of population specific distributions (S1\_Dataset:virus).  
248 The HERV-K at chr1:155596457-155605636, which we report as fixed, is notable because the  
249 reference allele ( $n/T=1$ ) is only found in AFR (Fig 5A, S7 Fig). Individuals from most other  
250 populations have  $n/T$  near 0.5. We mapped *k-mers* from individuals with  $n/T$  near 0.5 to the  
251 reference HERV-K sequence and confirmed that there is a loss of *k-mers* at several sites covered  
252 by the unique reference *k-mers* for this virus (S8 Fig). There are also cases where the reference  
253 allele is found in all populations except AFR (Fig 5B and see S7 Fig for additional examples).

254

255 **Fig 5. Population specificity of HERV-K alleles.** A) n/T plot for chr1:155596457-155605636 colored by  
256 each of the 5 super-populations. Only individuals from AFR and a few from AMR have the HERV-K  
257 reference sequence. B) Plot of chr5:156084717-156093896 colored by each of the 5 super-populations.  
258 In this case, all populations except AFR have the reference allele and all super-populations have an  
259 alternative allele that is not present in the databases.

260

## 261 **Discussion**

262 Our research provides a tool to mine whole genome sequence data to collectively  
263 evaluate the status of HERV-K provirus at known polymorphic and fixed sites in the human  
264 genome. The tool incorporates a statistical clustering algorithm to accommodate low depth  
265 sequence data and a visualization tool to explore the co-occurrence of polymorphic HERV-K in  
266 the global populations represented in the KGP data. There are numerous significant differences  
267 in the prevalence of individual and co-occurring polymorphic HERV-K among the five KGP super-  
268 populations. It is notable that individuals from EAS carry a lower total burden of HERV-K than  
269 other represented populations. These data provide a comprehensive framework of HERV-K  
270 genomic diversity to advance studies on potential roles for HERV-K in human disease, which  
271 have been alluring yet difficult to establish [19,20,22].

272

273 Tools developed to interrogate ERV insertional polymorphism typically exploit the  
274 unique signature created by the host-virus junction [11,44,45]. These approaches indicate that  
275 a site is occupied by an ERV but not whether there is a provirus associated with the site, which  
276 is more difficult to accomplish with short read sequence data. Our analysis tool provides an

277 efficient means to detect occupancy and provirus status in one step. We decrease  
278 computational time by analyzing only the set of reads that map to existing HERV-K in the  
279 reference genome. This approach is justified because the polymorphic HERV-K that are missing  
280 from the human reference are closely related to those in the reference genome assembly and  
281 hence reads derived from them map to a related HERV-K in the reference. We employ *k-mer*  
282 counting methods, which also increase computational efficiency. A reference set of *k-mers* that  
283 is unique to a HERV-K is generated for each location in the genome and the proportion of reads  
284 from the query set that maps to the *k-mer* reference set is reported as a continuous variable;  
285 there is no threshold of read count or depth imposed for classification. Instead we utilize a  
286 mixture model to cluster values and assign the same HERV-K status to the entire cluster.  
287 Clusters with  $n/T$  of 1 have all the unique *k-mers* identified in the HERV-K reference set. We  
288 classify other clusters by determining if *k-mers* mapped on the reference allele are distributed  
289 at sites in the coding portion of the genome or only in the LTR. This approach led to the  
290 interesting finding that several HERV-K could have population specific alleles.

291  
292 Wildschutte *et al* [11] have conducted the most comprehensive study of HERV-K  
293 prevalence in the KGP data to date. While the goal of that paper was to identify new  
294 polymorphic insertions of either provirus or solo LTR in the KGP data, their analyses provide the  
295 prevalence of some polymorphic HERV-K provirus for comparison with our results. There are  
296 five HERV-K previously reported in Subramanian *et al* 2011 [10] that were not included in the  
297 Wildschutte paper [11]; all are polymorphic in our analysis (range 43-99%, see Table 1 and  
298 S1\_Dataset:virus-column N). Seven polymorphic HERV-K, which Wildschutte *et al* [11] indicate

299 occur in greater than 98% of KGP individuals, are fixed in our study. Our estimated prevalence  
300 for 14 HERV-K differs from that reported in Wildschutte et al [11] by 5% or more. Of these 14,  
301 the prevalence estimates at chr1:155596457-155605636 are most divergent. Our data show  
302 this site is fixed for provirus and Wildschutte *et al* [11] report that only 14% of the KGP data, all  
303 from AFR, have a HERV-K provirus integration. Our plots for chr1:155596457-155605636 show  
304 that AFR individuals carry the reference allele at this site (n/T near 1, Fig 5A) and all other  
305 individuals have n/T near 0.5. The *k-mers* from individuals with low n/T values for  
306 chr1:155596457-155605636 map to only a subset of sites marked by unique *k-mers* in the  
307 coding region (S8 Fig), which is consistent with sequence polymorphism or a deletion at these  
308 positions. The reference set T is small for this HERV-K and therefore overall coverage of the  
309 genome is low. Because Wildschutte *et al* [11] used a minimum coverage threshold for their *k-*  
310 *mer* mapping method, it is possible that alleles present in non-AFR populations would be  
311 outside their inclusion criteria. There is a similar signal for alleles, represented by lower n/T  
312 values, at the other 13 HERV-K sites although the differences between our prevalence  
313 estimates and those of Wildschutte et al [11] are small (S1\_Dataset:virus). In most cases these  
314 putative alleles are found in all populations at different frequencies but in five there is some  
315 degree of population specificity (Fig 5, S7 Fig, S1\_Dataset:virus). Our results indicate that there  
316 could be considerably more sequence variation in HERV-K among human populations than  
317 previously appreciated. These data also suggest that using HERV-K consensus sequences to  
318 study pathogenic potential could miss important features of HERV-K polymorphism, which can  
319 be characterized by both the site occupancy status (presence/absence) and, when present, by  
320 sequence differences in among individuals.



321

322           HERV-Ks are the youngest family of endogenous retroviruses in humans and  
323 consequently they share considerable sequence identity. This has the effect of limiting the  
324 number of unique sites associated with some HERV-K, which decreases the size of the reference  
325 set T (S1\_Dataset:virus). Another example of a polymorphic HERV-K with a small set T is  
326 chr8:12316492, reported to be human specific (9), which shares a recent common ancestor  
327 with two older HERV-K (chr8:12073970 and chr8:8054700) all located at 8p23.1. Our data  
328 indicate that 14% of KGP individuals have the reference allele and most n/T values are less than  
329 0.4 and fall into two non-zero clusters (S9 Fig). These appear to represent various structural  
330 variations (truncation or deletion) because there are several peaks in both the LTR and in the 5'  
331 coding region. Thus although an n/T ratio of 0 or 1 reliably indicates absence and presence of  
332 the reference HERV-K, respectively, when T is small, sequence polymorphism and a deletion  
333 event can be difficult to distinguish from a solo LTR. However, because our mixture model  
334 statistically clusters similar n/T values, all individuals in a cluster have the same status (e.g allele  
335 or solo LTR) even if we do not know what that state is.

336

337           Our approach provides human disease researchers with a rapid means to determine if  
338 the frequency, and overall burden of the 96 HERV-K proviruses evaluated differ between a  
339 patient data set and populations represented in KGP. The visualization tool allows investigators  
340 to determine if HERV-Ks co-occur in certain clinical settings. The potential that HERV-K has  
341 multiple allelic forms in different populations is worthy of further analysis because a sequence  
342 allele could also contribute to a disease condition.

343

## 344 **Materials and methods**

345

### 346 **HERV-K proviruses**

347       The 96 HERV-K proviruses previously reported [10,11,32,46] were supplemented with  
348 HERV-K alleles present in the NCBI nt database (November 2016 release). We required that any  
349 allele of a HERV-K from the nt database have at least 2kb of reference-matching host flanking  
350 sequence to confirm genome location. In total, 234 alleles were collected at the 96 known  
351 HERV-K loci (92 in hg19, and 4 from the nt database). The location information and virus  
352 features are summarized in S1\_Dataset: virus.

353

### 354 **Developing a *k-mer* based detection model**

355       We identified the *k-mers* that correspond to unique sequence characterizing each HERV-  
356 K. *K-mers* are substrings (subsequences) of length *k* that exist in a string (DNA sequence). The  
357 length *k* is determined empirically (S1 Method). Each *k-mer* is labeled with the corresponding  
358 viruses in which it is observed.

359       Only those *k-mers* referring to a single virus, unique *k-mers*, are selected for the set T. Where  
360 multiple alleles of a HERV-K are available, *k-mers* unique to all alleles at that location comprise  
361 T. Multiple 2bps different *k-mers* (such as SNPs) corresponding to the same location on the  
362 virus, are merged into a single entry for the purposes of computing T. We map unique *k-mers*  
363 back to the corresponding alleles to determine depth of the HERV-K (S3 Fig) and whether *k-*  
364 *mers* are located in LTRs. (S1\_Dataset: virus)

365

366

### 367 **Analysis of 1000 Genome Project (KGP) Data**

368 To develop a method to recover sequences containing information on HERV-K we  
369 leverage the fact that HERV-Ks are closely related. Thus, most sequence reads obtained from an  
370 individual with a polymorphic HERV-K that is absent in the human reference, hg19, will map to  
371 the location of one of the closely related HERV-K that is present in the human genome reference.  
372 A file with the coordinates for all reported HERV-K insertions is used to extract mapped reads  
373 from a genome sequence file (S1\_Dataset:bed, which provides the coordinates for both hg19  
374 and hg38). Note that the KGP data were mapped to GRCh37, which includes the decoy  
375 sequence hs37d5. This decoy contains the HERV-K at chr1:73594980\_73595948 and is not  
376 present in hg19. Thus, we did not recover any reads for this HERV-K, which is polymorphic but  
377 reportedly at high prevalence in most populations [11].

378

379 The KGP data were downloaded in aligned Binary Alignment/Map (BAM) format  
380 (<ftp://ftp.ncbi.nlm.nih.gov/1000genomes/ftp/data/>). It contains data for 2,535 individuals  
381 (S1\_Dataset:KGP) sequenced via low-depth whole-genome sequencing (mean depth = 6.98X).  
382 The individuals represent 26 populations, derived from 5 super-populations, including African  
383 (AFR), Admixed America (AMR), East Asian (EAS), European (EUR), and South Asian (SAS)  
384 [47,48]. Of 2,535 individuals, 28 also have high-depth DNA sequences (mean depth = 48.06X),  
385 which we use as a pilot dataset for our clustering methods, described below and in  
386 Supplementary Methods.

387

388           Our computational framework to indicate the status of each known HERV-K provirus is  
389 based on the  $n/T$  ratio, which is the proportion of  $k$ -mers from each individual that are identical  
390 to the reference set T for each HERV-K. Sequence reads are extracted from a mapped file of  
391 whole human genome sequence data based on coordinates corresponding to each annotated  
392 HERV-K. The reads are  $k$ -merized and mapped to the set T, which represents all unique  $k$ -mers  
393 assigned to each HERV-K in the reference set. We use exact match to map  $k$ -mers data set to  
394 the unique  $k$ -mers references. The  $n/T$  ratio is used as an indicator of the presence of each  
395 HERV-K. Using a hash table (S5 Method), it takes 15 minutes to generate the  $n/T$  matrix for 100  
396 files. The source code for the entire process is at <https://github.com/lwl1112/polymorphicHERV>

397

398

### 399 **Dirichlet process Gaussian mixture model (DPGMM)**

400           Because  $n$  (the number of  $k$ -mers obtained from a persons' sequence data, that map to  
401 a specific HERV-K) is affected by sequencing depth, we utilized a statistical model to cluster  $n/T$   
402 for each HERV-K for each individual and assigned HERV-K status to a cluster. Mixture modeling  
403 is arguably the most widely used statistical method for clustering. In this analysis, we follow the  
404 work proposed by Lin et al. 2015 [49], which employs a Gaussian Mixture Model (GMM) with  
405 density function given by

$$406 \quad f(x | \theta) = \sum_{j=1}^M \pi_j N(\mu_j, \Sigma_j), \quad (1)$$

407 and with a mixture of relatively large number  $M$  Gaussian components (denoted by  $N(\mu_j, \Sigma_j)$ ,  
408 for  $j = 1:M$ ) to represent the data density. To allow a flexible modeling approach, we employ  
409 the standard Bayesian (truncated) Dirichlet Process prior for the parameters  $\theta = (\pi_j, \mu_j, \Sigma_j$   
410 ,  $j = 1:M$  [50,51]. The idea is that some of the mixture probabilities ( $\pi_j$ ) can be zero, hence the  
411 actual number of mixture components needed may be smaller than the upper bound  $M$ . This  
412 mechanism allows automatic determination of the number of mixture components needed by  
413 the data set at hand. Given a fitted model via the Bayesian expectation–maximization  
414 algorithm, in terms of estimates of all parameters  $\theta$ , we identify clusters by aggregating  
415 Gaussian components. Merging components into clusters can be done by associating each of  
416 the Gaussian components to the closest mode of  $f(x|\theta)$ . Hence, the number of modes identified  
417 is the realized number of clusters. [See S2 Method for full detail]

418

#### 419 **Co-occurrence of polymorphic HERV-K**

420 We consider that both the individual frequency of a HERV-K and the co-occurrence of  
421 multiple HERV-K could differ among populations.

422 The time of a brute-force approach for finding all combinations  $C_m$  of size  $m$  from  $p$

423 polymorphic HERV-K is  $(\sum_{m=1}^p \binom{p}{m} = 2^p - 1)$ , which is not efficient and redundant. We

424 employed the Apriori algorithm [52], which is commonly used for finding frequent pattern sets;

425 in our case indicating which polymorphic HERV-K frequently appear together. It first generates

426 combinations  $C_m$  (initialized to 1). In the optimization, frequent combinations  $F_m$  are returned

427 from candidates  $C_m$  when frequency exceeds the minimum threshold of co-occurrence.  $F_m$  are

428 then self-joined to generate combinations  $C_{m+1}$  of size  $m+1$  and out of which  $F_{m+1}$  satisfy the  
429 minimum co-occurrence. In each pass, candidate combinations are pruned so as to avoid  
430 generating all combinations, which reduces running time significantly.

431

432

### 433 **Statistical analysis of HERV-K frequencies across populations**

434 We make statistical comparisons across 5 super-populations for the following three  
435 problems. For each problem, there are  $\binom{5}{2} = 10$  families of 1-to-1 comparisons conducted. The  
436 ‘prop-test’ function in R is used to test whether the proportions for two super-populations are  
437 the same.

- 438 1) individual prevalence of polymorphic HERV-K. (20 comparisons for each polymorphic HERV-K  
439 in a family)
- 440 2) the number of polymorphic HERV-K present per individual. (21 comparisons as the number  
441 of co-occurring polymorphic HERV-K is from 0 to 20)
- 442 3) the co-occurrence for combinations of polymorphic HERV-K.

443 Therefore, multiple hypotheses would be conducted on frequencies  $F$  across super-populations  
444  $P_{1...5}$  as follows:

445 Null hypothesis,  $H_0: F_{P_i} = F_{P_j}$ , where  $i \neq j$ ;

446 Alternative hypothesis,  $H_A: F_{P_i} \neq F_{P_j}$ , where  $i \neq j$ .

447 A separate P-value is computed for each test and the Benjamini-Hochberg procedure [53] is  
448 used to account for multiple comparisons.

449

## 450 **Visualization in D3.js**

451 We utilized D3.js (Data Driven Documents) [54], an open-source java script library to  
452 create an interactive visualization to display co-occurrence of polymorphic HERV-Ks in human  
453 populations. Our visualization system includes two modules, a welcome page and a result page.  
454 Input JSON data include locations of polymorphic HERV-K, population information, and the 0/1  
455 (absence / presence) matrix. (See S3 Method). Source code is available at:

456 <https://github.com/lwl1112/polymorphicHERV/tree/master/visualization>

457

458

## 459 **Acknowledgements**

460 WL was supported in part by the Louis S. and Sara S. Michael Endowed Graduate  
461 Fellowship in Engineering and the Fred A. and Susan Breidenbach Graduate Fellowship in  
462 Engineering.

463

464

## 465 **References**

466

- 467 1. Hayward A, Grabherr M, Jern P. Broad-scale phylogenomics provides insights into retrovirus-host  
468 evolution. *Proc Natl Acad Sci.* 2013;110: 20146–20151. doi:10.1073/pnas.1315419110
- 469 2. Feschotte C, Gilbert C. Endogenous viruses: insights into viral evolution and impact on host  
470 biology. *Nat Rev Genet.* 2012;13: 283–296. doi:10.1038/nrg3199
- 471 3. Stoye JP. Studies of endogenous retroviruses reveal a continuing evolutionary saga. *Nat Rev*

- 472 Microbiol. 2012;10: 395–406. doi:10.1038/nrmicro2783
- 473 4. Gifford R, Tristem M. The evolution, distribution and diversity of endogenous retroviruses. *Virus*  
474 *Genes*. 2003;26: 291–315. Available: <http://www.ncbi.nlm.nih.gov/pubmed/12876457>
- 475 5. Weiss RA. The discovery of endogenous retroviruses. *Retrovirology*. 2006;3: 67.  
476 doi:10.1186/1742-4690-3-67
- 477 6. Jern P, Coffin JM. Effects of Retroviruses on Host Genome Function. *Annu Rev Genet*. 2008;42:  
478 709–732. doi:10.1146/annurev.genet.42.110807.091501
- 479 7. Löwer R, Löwer J, Kurth R. The viruses in all of us: characteristics and biological significance of  
480 human endogenous retrovirus sequences. *Proc Natl Acad Sci U S A*. 1996;93: 5177–84.  
481 Available: <http://www.ncbi.nlm.nih.gov/pubmed/8643549>
- 482 8. Bannert N, Kurth R. Retroelements and the human genome: New perspectives on an old relation.  
483 *Proc Natl Acad Sci*. 2004;101: 14572–14579. doi:10.1073/pnas.0404838101
- 484 9. Moyes D, Griffiths DJ, Venables PJ. Insertional polymorphisms: a new lease of life for endogenous  
485 retroviruses in human disease. *Trends Genet*. 2007;23: 326–333. doi:10.1016/j.tig.2007.05.004
- 486 10. Subramanian RP, Wildschutte JH, Russo C, Coffin JM. Identification, characterization, and  
487 comparative genomic distribution of the HERV-K (HML-2) group of human endogenous  
488 retroviruses. *Retrovirology*. 2011;8: 90. doi:10.1186/1742-4690-8-90
- 489 11. Wildschutte JH, Williams ZH, Montesion M, Subramanian RP, Kidd JM, Coffin JM. Discovery of  
490 unfixed endogenous retrovirus insertions in diverse human populations. *Proc Natl Acad Sci*.  
491 2016;113: E2326–E2334. doi:10.1073/pnas.1602336113
- 492 12. Belshaw R, Watson J, Katzourakis A, Howe A, Woolven-Allen J, Burt A, et al. Rate of  
493 Recombinational Deletion among Human Endogenous Retroviruses. *J Virol*. 2007;81: 9437–9442.  
494 doi:10.1128/JVI.02216-06
- 495 13. Medstrand P, Mager DL. Human-specific integrations of the HERV-K endogenous retrovirus



- 496 family. *J Virol.* 1998;72: 9782–7. Available: <http://www.ncbi.nlm.nih.gov/pubmed/9811713>
- 497 14. Hughes JF, Coffin JM. Human endogenous retrovirus K solo-LTR formation and insertional  
498 polymorphisms: Implications for human and viral evolution. *Proc Natl Acad Sci.* 2004;101: 1668–  
499 1672. doi:10.1073/pnas.0307885100
- 500 15. Belshaw R, Dawson ALA, Woolven-Allen J, Redding J, Burt A, Tristem M. Genomewide Screening  
501 Reveals High Levels of Insertional Polymorphism in the Human Endogenous Retrovirus Family  
502 HERV-K(HML2): Implications for Present-Day Activity. *J Virol.* 2005;79: 12507–12514.  
503 doi:10.1128/JVI.79.19.12507-12514.2005
- 504 16. Marchi E, Kanapin A, Magiorkinis G, Belshaw R. Unfixed Endogenous Retroviral Insertions in the  
505 Human Population. *J Virol.* 2014;88: 9529–9537. doi:10.1128/JVI.00919-14
- 506 17. Shin W, Lee J, Son S-Y, Ahn K, Kim H-S, Han K. Human-Specific HERV-K Insertion Causes  
507 Genomic Variations in the Human Genome. Cordaux R, editor. *PLoS One.* 2013;8: e60605.  
508 doi:10.1371/journal.pone.0060605
- 509 18. Gröger V, Cynis H. Human Endogenous Retroviruses and Their Putative Role in the Development  
510 of Autoimmune Disorders Such as Multiple Sclerosis. *Front Microbiol.* 2018;9.  
511 doi:10.3389/fmicb.2018.00265
- 512 19. Young GR, Stoye JP, Kassiotis G. Are human endogenous retroviruses pathogenic? An approach  
513 to testing the hypothesis. *BioEssays.* 2013;35: 794–803. doi:10.1002/bies.201300049
- 514 20. Ryan FP. Human endogenous retroviruses in health and disease: a symbiotic perspective. *JRSM.*  
515 2004;97: 560–565. doi:10.1258/jrsm.97.12.560
- 516 21. Volkman HE, Stetson DB. The enemy within: endogenous retroelements and autoimmune  
517 disease. *Nat Immunol.* 2014;15: 415–422. doi:10.1038/ni.2872
- 518 22. Magiorkinis G, Belshaw R, Katzourakis A. “There and back again”: revisiting the  
519 pathophysiological roles of human endogenous retroviruses in the post-genomic era. *Philos Trans*

- 520 R Soc B Biol Sci. 2013;368: 20120504–20120504. doi:10.1098/rstb.2012.0504
- 521 23. Löwer R. The pathogenic potential of endogenous retroviruses: facts and fantasies. Trends  
522 Microbiol. 1999;7: 350–356. doi:10.1016/S0966-842X(99)01565-6
- 523 24. Hohn O, Hanke K, Bannert N. HERV-K(HML-2), the Best Preserved Family of HERVs:  
524 Endogenization, Expression, and Implications in Health and Disease. Front Oncol. 2013;3.  
525 doi:10.3389/fonc.2013.00246
- 526 25. Hughes JF. Human Endogenous Retroviral Elements as Indicators of Ectopic Recombination  
527 Events in the Primate Genome. Genetics. 2005;171: 1183–1194.  
528 doi:10.1534/genetics.105.043976
- 529 26. Hughes JF, Coffin JM. Evidence for genomic rearrangements mediated by human endogenous  
530 retroviruses during primate evolution. Nat Genet. 2001;29: 487–489. doi:10.1038/ng775
- 531 27. Romanish MT, Cohen CJ, Mager DL. Potential mechanisms of endogenous retroviral-mediated  
532 genomic instability in human cancer. Semin Cancer Biol. 2010;20: 246–253.  
533 doi:10.1016/j.semcancer.2010.05.005
- 534 28. Kamp C, Hirschmann P, Voss H, Huellen K, Vogt PH. Two long homologous retroviral sequence  
535 blocks in proximal Yq11 cause AZFa microdeletions as a result of intrachromosomal  
536 recombination events. Hum Mol Genet. 2000;9: 2563–72. Available:  
537 <http://www.ncbi.nlm.nih.gov/pubmed/11030762>
- 538 29. Kidd JM, Graves T, Newman TL, Fulton R, Hayden HS, Malig M, et al. A Human Genome  
539 Structural Variation Sequencing Resource Reveals Insights into Mutational Mechanisms. Cell.  
540 2010;143: 837–847. doi:10.1016/j.cell.2010.10.027
- 541 30. Cohen CJ, Lock WM, Mager DL. Endogenous retroviral LTRs as promoters for human genes: A  
542 critical assessment. Gene. 2009;448: 105–114. doi:10.1016/j.gene.2009.06.020
- 543 31. Simmons W. The Role of Human Endogenous Retroviruses (HERV-K) in the Pathogenesis of

- 544 Human Cancers. *Mol Biol.* 2016;05. doi:10.4172/2168-9547.1000169
- 545 32. Wildschutte JH, Ram D, Subramanian R, Stevens VL, Coffin JM. The distribution of insertionally  
546 polymorphic endogenous retroviruses in breast cancer patients and cancer-free controls.  
547 *Retrovirology.* 2014;11: 62. doi:10.1186/s12977-014-0062-3
- 548 33. Kassiotis G, Stoye JP. Making a virtue of necessity: the pleiotropic role of human endogenous  
549 retroviruses in cancer. *Philos Trans R Soc B Biol Sci.* 2017;372: 20160277.  
550 doi:10.1098/rstb.2016.0277
- 551 34. Johanning GL, Malouf GG, Zheng X, Esteva FJ, Weinstein JN, Wang-Johanning F, et al.  
552 Expression of human endogenous retrovirus-K is strongly associated with the basal-like breast  
553 cancer phenotype. *Sci Rep.* 2017;7: 41960. doi:10.1038/srep41960
- 554 35. Bhardwaj N, Coffin JM. Endogenous Retroviruses and Human Cancer: Is There Anything to the  
555 Rumors? *Cell Host Microbe.* 2014;15: 255–259. doi:10.1016/j.chom.2014.02.013
- 556 36. Hanke K, Hohn O, Bannert N. HERV-K(HML-2), a seemingly silent subtenant - but still waters run  
557 deep. *APMIS.* 2016;124: 67–87. doi:10.1111/apm.12475
- 558 37. Trela M, Nelson PN, Rylance PB. The role of molecular mimicry and other factors in the  
559 association of Human Endogenous Retroviruses and autoimmunity. *APMIS.* 2016;124: 88–104.  
560 doi:10.1111/apm.12487
- 561 38. Antony JM, DesLauriers AM, Bhat RK, Ellestad KK, Power C. Human endogenous retroviruses  
562 and multiple sclerosis: Innocent bystanders or disease determinants? *Biochim Biophys Acta - Mol*  
563 *Basis Dis.* 2011;1812: 162–176. doi:10.1016/j.bbadis.2010.07.016
- 564 39. Tugnet N. Human Endogenous Retroviruses (HERVs) and Autoimmune Rheumatic Disease: Is  
565 There a Link? *Open For Sci J.* 2013;7: 13–21. doi:10.2174/1874312901307010013
- 566 40. Li W, Lee M-H, Henderson L, Tyagi R, Bachani M, Steiner J, et al. Human endogenous retrovirus-  
567 K contributes to motor neuron disease. *Sci Transl Med.* 2015;7: 307ra153-307ra153.

- 568           doi:10.1126/scitranslmed.aac8201
- 569   41.    Douville RN, Nath A. Human Endogenous Retrovirus-K and TDP-43 Expression Bridges ALS and  
570           HIV Neuropathology. *Front Microbiol.* 2017;8. doi:10.3389/fmicb.2017.01986
- 571   42.    Nexø BA, Villesen P, Nissen KK, Lindegaard HM, Rossing P, Petersen T, et al. Are human  
572           endogenous retroviruses triggers of autoimmune diseases? Unveiling associations of three  
573           diseases and viral loci. *Immunol Res.* 2016;64: 55–63. doi:10.1007/s12026-015-8671-z
- 574   43.    Fukunaga K. Introduction to statistical pattern recognition. Academic press; 1990.
- 575   44.    Ciuffi A, Ronen K, Brady T, Malani N, Wang G, Berry CC, et al. Methods for integration site  
576           distribution analyses in animal cell genomes. *Methods.* 2009;47: 261–268.  
577           doi:10.1016/j.ymeth.2008.10.028
- 578   45.    Witherspoon DJ, Xing J, Zhang Y, Watkins WS, Batzer MA, Jorde LB. Mobile element scanning  
579           (ME-Scan) by targeted high-throughput sequencing. *BMC Genomics.* 2010;11: 410.  
580           doi:10.1186/1471-2164-11-410
- 581   46.    Bhardwaj N, Montesion M, Roy F, Coffin J. Differential Expression of HERV-K (HML-2) Proviruses  
582           in Cells and Virions of the Teratocarcinoma Cell Line Tera-1. *Viruses.* 2015;7: 939–968.  
583           doi:10.3390/v7030939
- 584   47.    Sudmant PH, Rausch T, Gardner EJ, Handsaker RE, Abyzov A, Huddleston J, et al. An integrated  
585           map of structural variation in 2,504 human genomes. *Nature.* 2015;526: 75–81.  
586           doi:10.1038/nature15394
- 587   48.    Gibbs RA, Boerwinkle E, Doddapaneni H, Han Y, Korchina V, Kovar C, et al. A global reference  
588           for human genetic variation. *Nature.* 2015;526: 68–74. doi:10.1038/nature15393
- 589   49.    Lin L, Chan C, West M. Discriminative variable subsets in Bayesian classification with mixture  
590           models, with application in flow cytometry studies. *Biostatistics.* 2015; kxv021.  
591           doi:10.1093/biostatistics/kxv021

- 592 50. Escobar MD, West M. Bayesian Density Estimation and Inference Using Mixtures. *J Am Stat*  
593 *Assoc.* 1995;90: 577. doi:10.2307/2291069
- 594 51. Ishwaran H, James LF. Gibbs Sampling Methods for Stick-Breaking Priors. *J Am Stat Assoc.*  
595 2001;96: 161–173. doi:10.1198/016214501750332758
- 596 52. Huang L, Chen H, Wang X, Chen G. A fast algorithm for mining association rules. *J Comput Sci*  
597 *Technol.* 2000;15: 619–624. doi:10.1007/BF02948845
- 598 53. Benjamini Y, Hochberg Y. Controlling the false discovery rate: a practical and powerful approach  
599 to multiple testing. *J R Stat Soc Ser B.* 1995; 289–300. doi:10.2307/2346101
- 600 54. Bostock M, Ogievetsky V, Heer J. D<sup>3</sup> Data-Driven Documents. *IEEE Trans Vis Comput Graph.*  
601 2011;17: 2301–2309. doi:10.1109/TVCG.2011.185
- 602
- 603

(A)

chr12:55727215-55728183 (K=70)

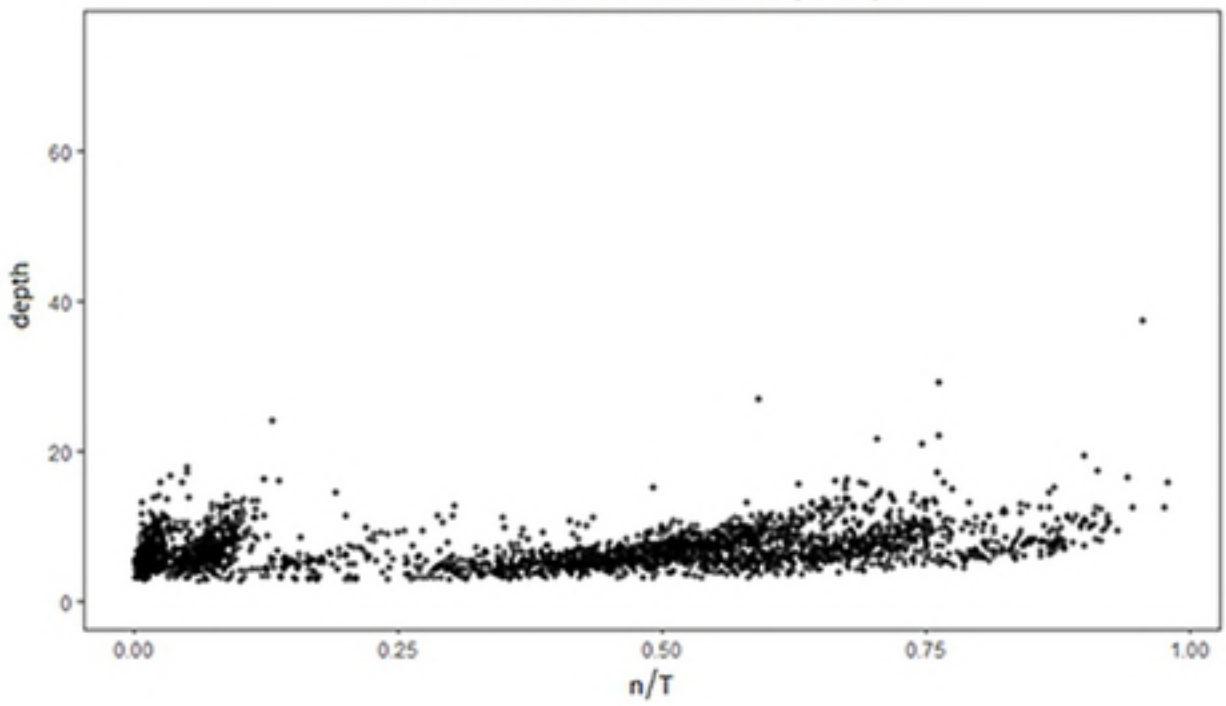

(B)

chr12:55727215-55728183 (K=50)

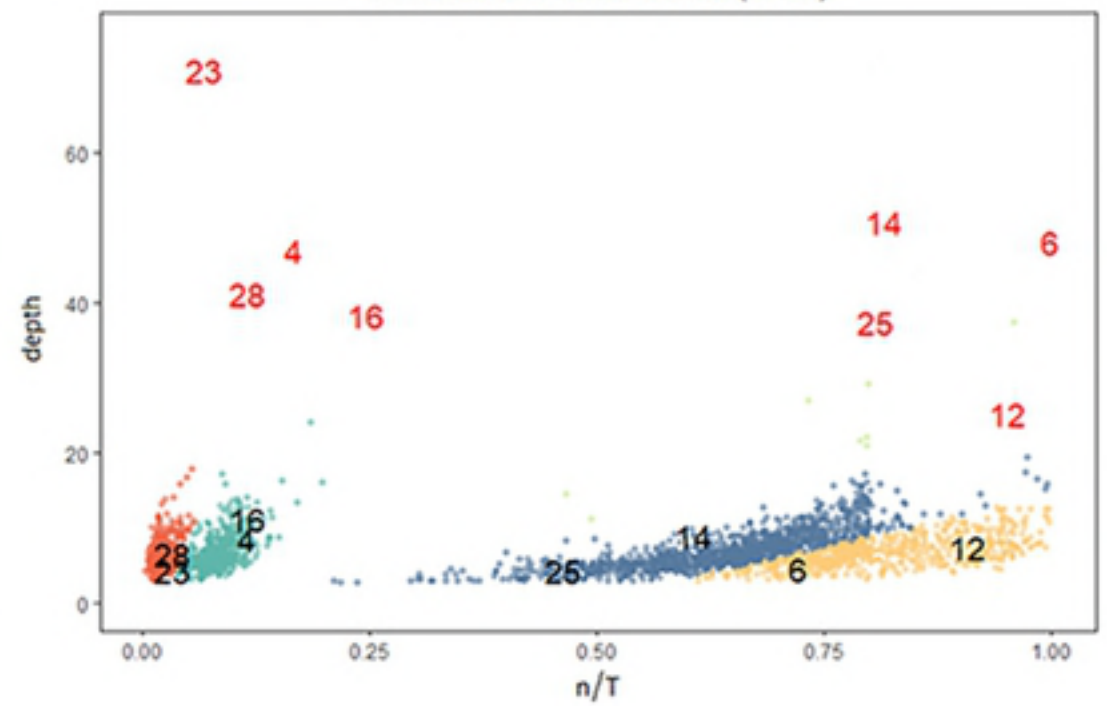

Figure

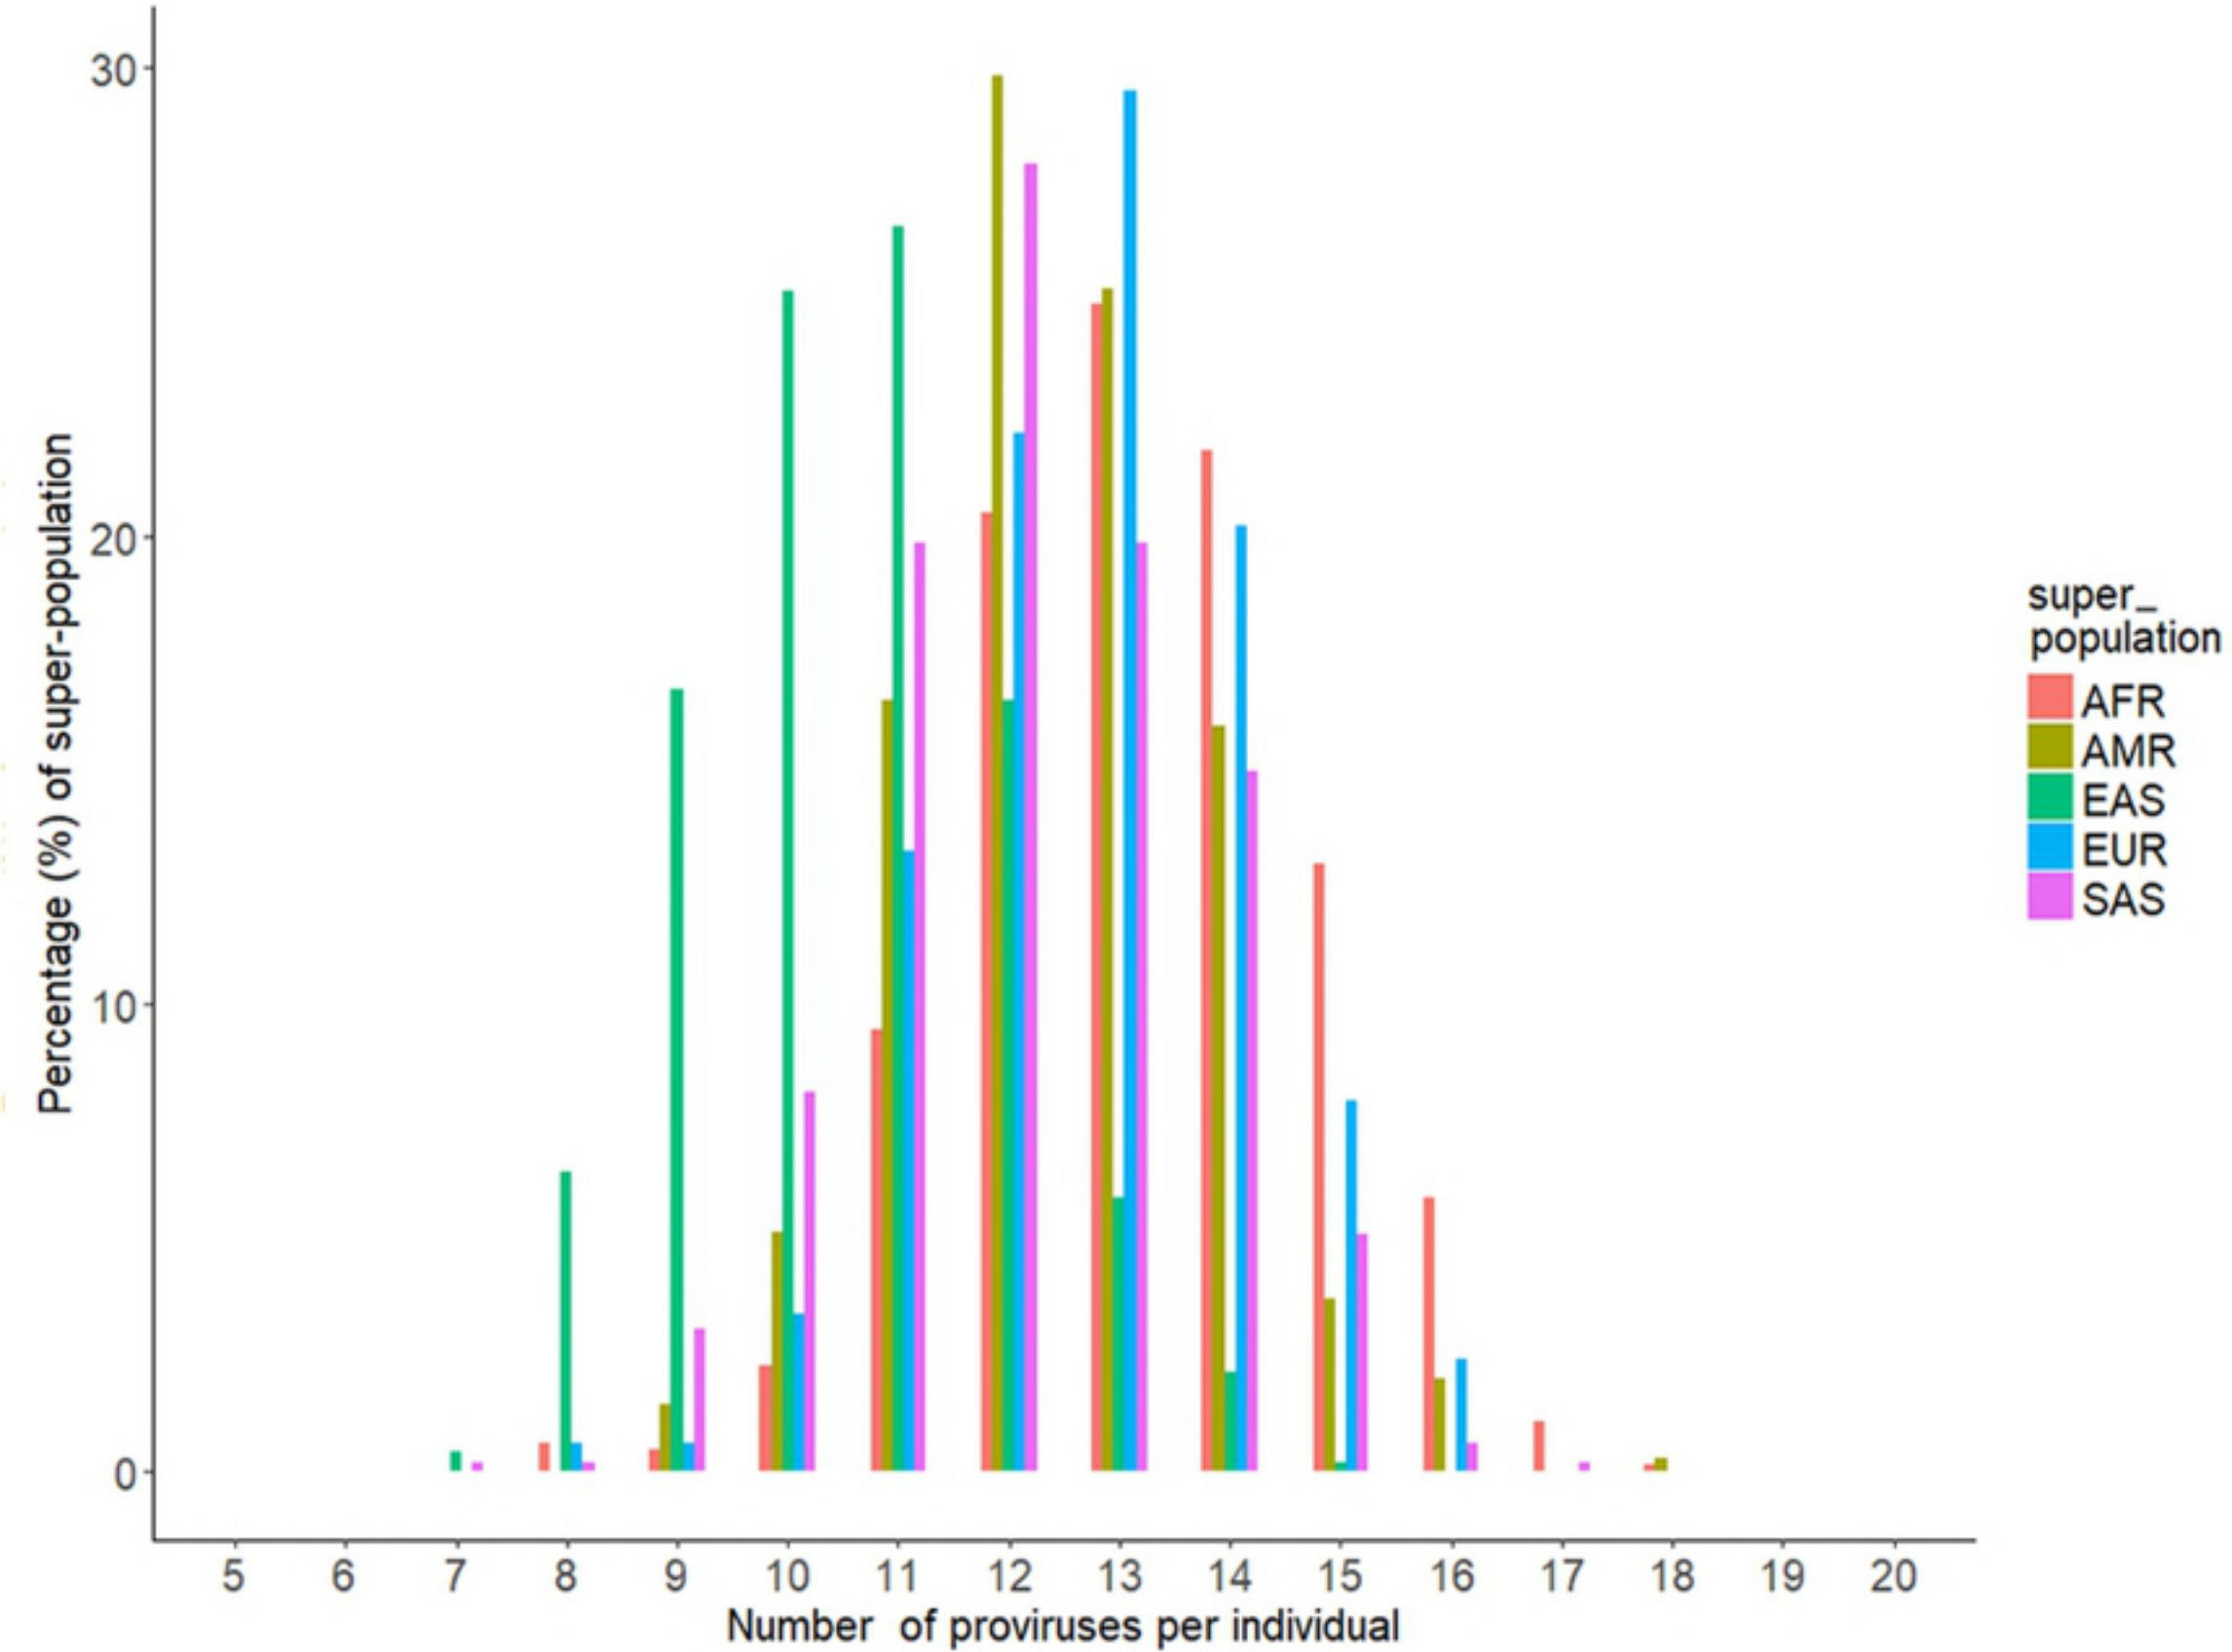

Figure

A)

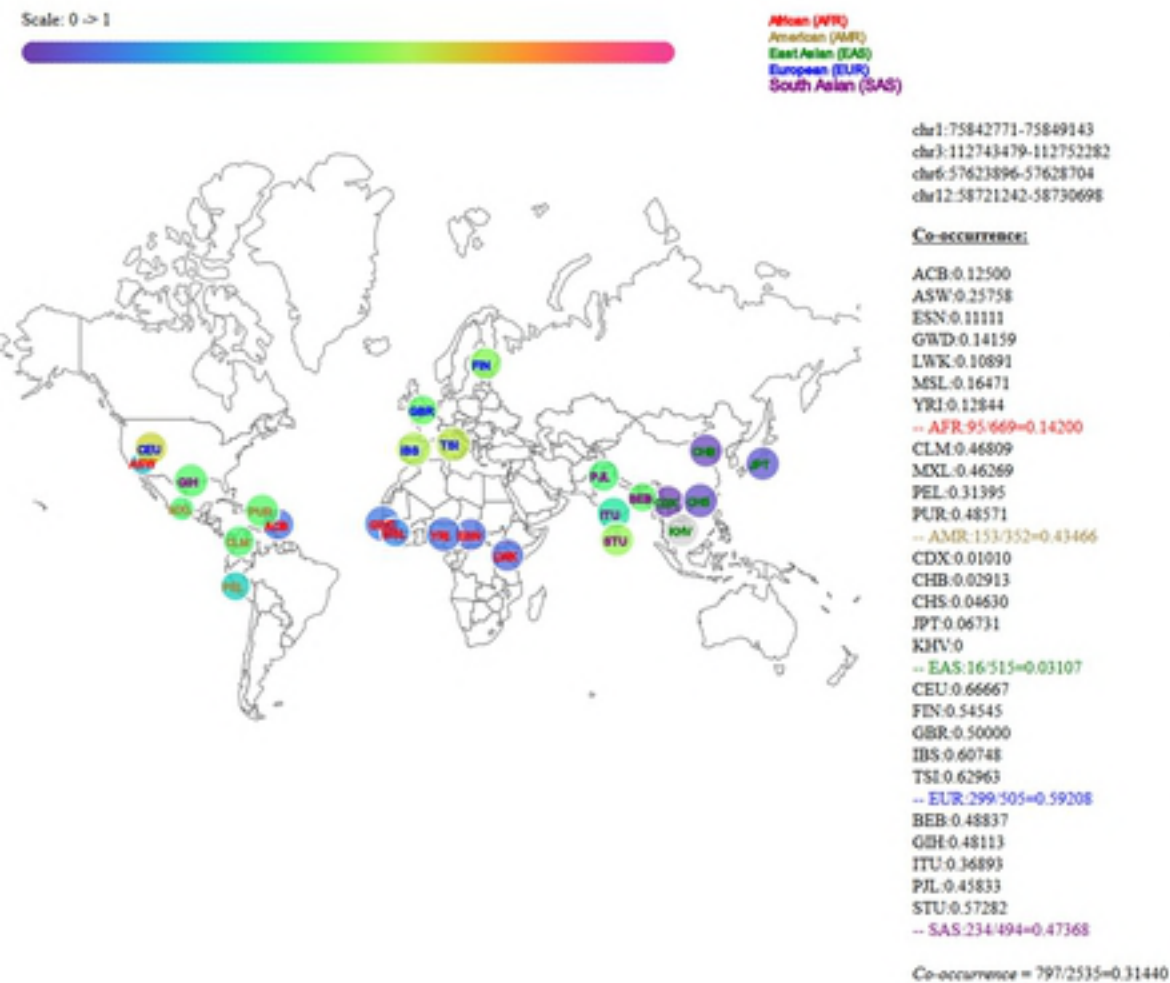

B)

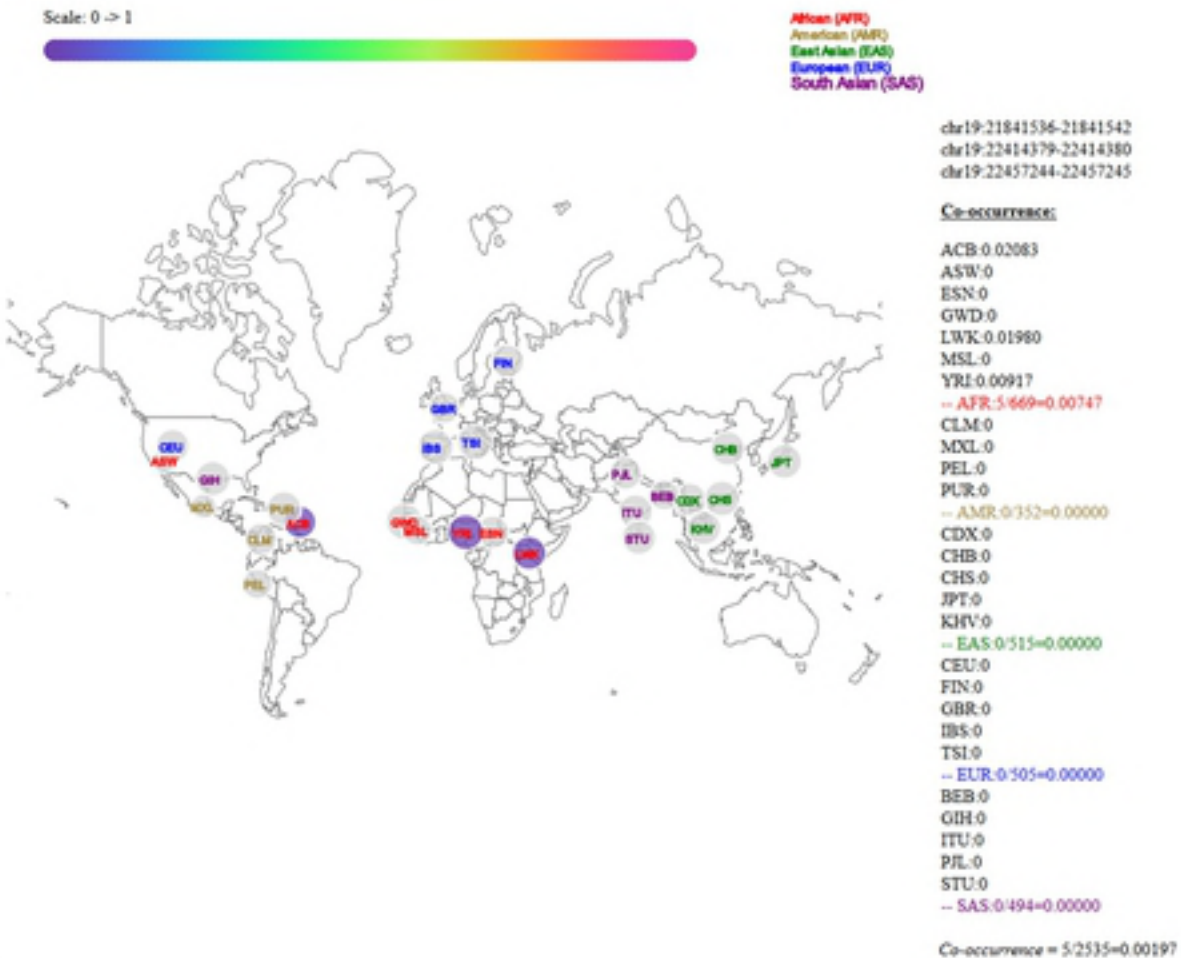

Figure



**(A)**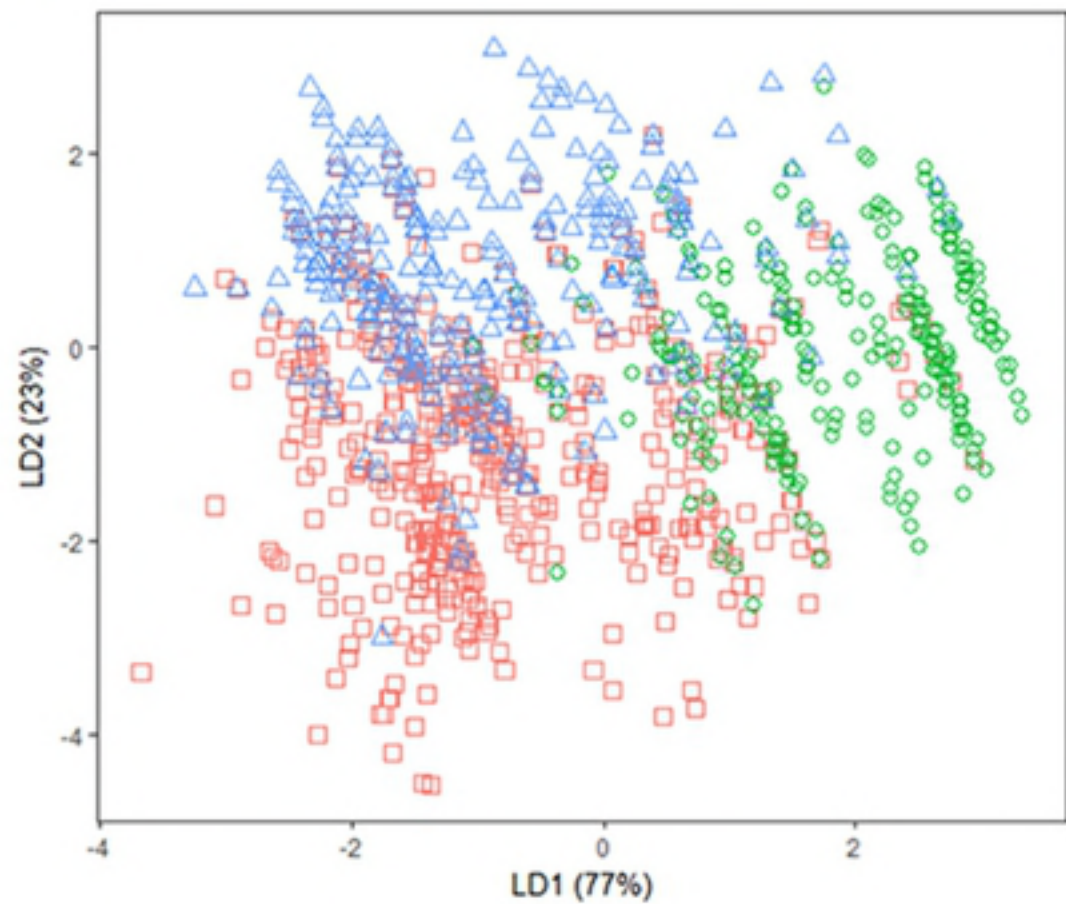**(B)**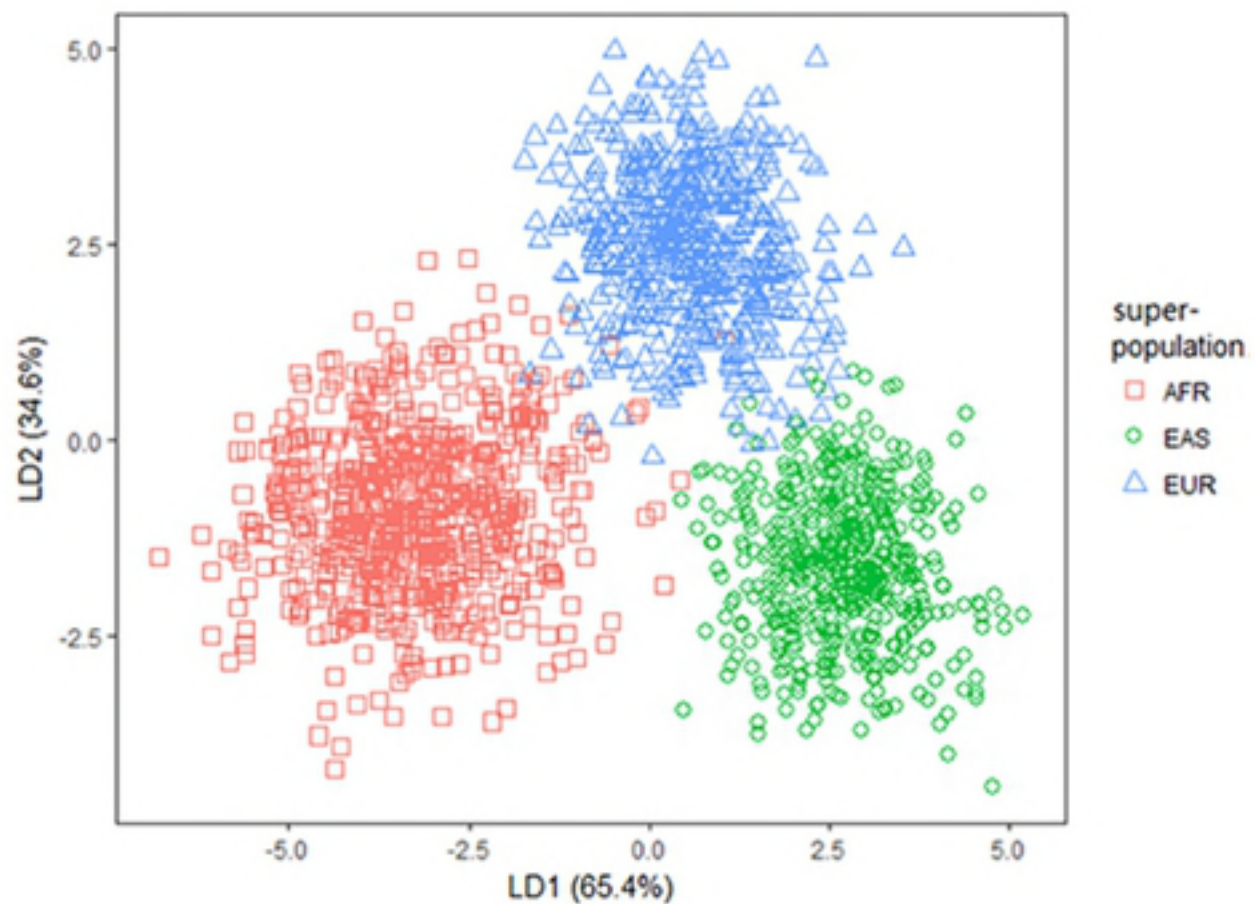**Figure**

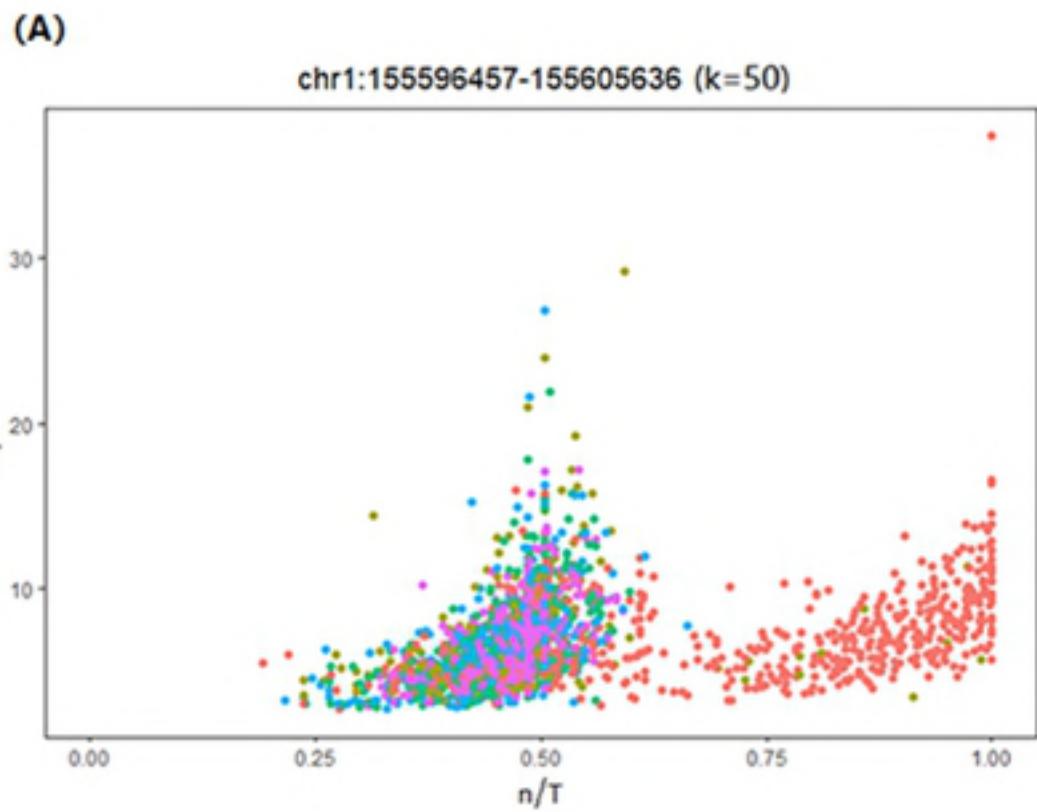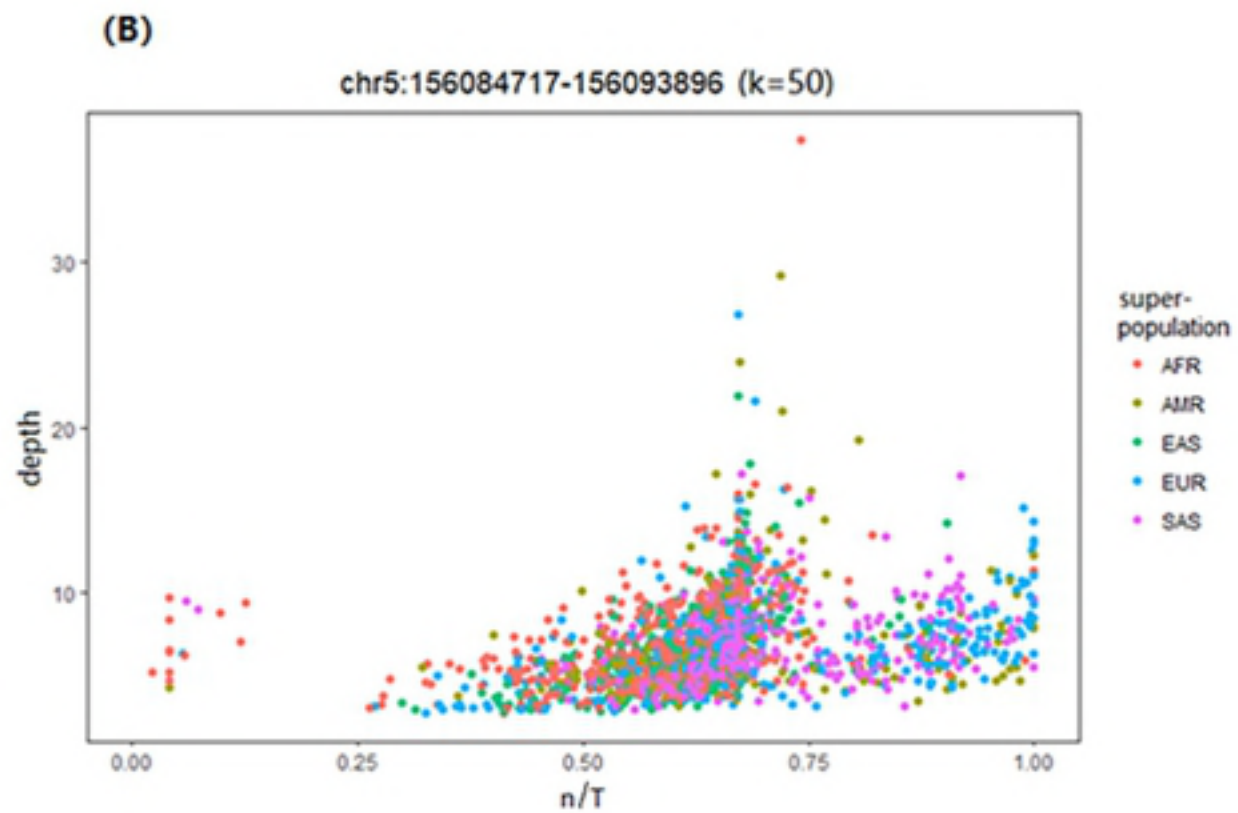

Figure
